# Supplementary material for: A nanoporous Ni(OH)2 interlinked Co3O4 heterojunction: a novel approach to chromium(vi) detection
Source: Royal Society of Chemistry journal article supplement (doi:10.1039/d5na01116g), 2026-04-15
Supplement: d5na01116g1.pdf [file d5na01116g1.pdf]

## Nanoporous Ni(OH)<sub>2</sub> Interlinked Co<sub>3</sub>O<sub>4</sub> Heterojunction: A Novel Approach to Chromium (VI) Detection

Gitashree Darabdhara,<sup>a</sup> Manash J. Baruah,<sup>b</sup> Eramoni Saikia,<sup>c</sup> Shivaneer Borpatra Gohain,<sup>d</sup> Rajarshi Bayan,<sup>e</sup> Rahul Kemprai,<sup>f</sup> Dipankoj Gogoi,<sup>g</sup> Young-Bin Park,<sup>h</sup> Biraj Das,<sup>b,\*</sup> Mukesh Sharma<sup>e,\*</sup>

<sup>a</sup>Department of Chemistry, Jagannath Barooah University, Jorhat, Assam, India 785001

<sup>b</sup>Department of Chemistry, D. C. B. Girls College, Jorhat, Assam, India, 785001

<sup>c</sup>Department of Chemistry, D. D. R. College, Chabua, Dibrugarh, Assam, India, 786184

<sup>d</sup>Department of Chemistry, Dimoria College (Autonomous), Khetri, Kamrup(M), Guwahati, Assam, India, 782403

<sup>e</sup>Department of Chemistry, Arya Vidyapeeth College (Autonomous), Guwahati, Assam, India, 781016

<sup>f</sup>Department of Chemistry, Suren Das College (Autonomous), Hajo, Kamrup, Assam, India, 781102

<sup>g</sup>Department of Chemistry, D. H. S. K. College (Autonomous), Dibrugarh, Assam, India, 786001

<sup>h</sup>Department of Mechanical Engineering, Ulsan National Institute of Science and Technology, UNIST-gil 50, Ulju-gun, Ulsan 44919, Republic of Korea

The average crystallite size ( $D$ ) is calculated using the following equation:

$$D = \frac{\lambda}{\beta \cos \theta} K \dots \dots \dots \text{(Equation 2)}$$

where:

- $K$  (*Shape Factor*): 0.9 (standard for spherical nanoporous structures).
- $\lambda$  (X-ray Wavelength): 0.15406 nm (for the Cu-K $\alpha$  radiation)
- $\beta$  (FWHM): The Full Width at Half Maximum of the diffraction peak (converted to radians).
- $\theta$  (Bragg Angle): Half of the  $2\theta$  value of the chosen peak.

From Figure 2a, the most prominent peak for the heterojunction is observed at  $2\theta=31.1^\circ$ , corresponding to the  $\text{Co}_3\text{O}_4$  phase,  $2\theta=31.1^\circ \rightarrow \theta=15.55^\circ$ .

From the high-resolution XRD pattern provided in the manuscript, the average FWHM ( $\beta$ ) for the primary peaks is approximately 0.0152 radians (derived from a  $0.87^\circ$  broadening).

By plugging the values into the equation

$$D = 0.0152 \times \cos(15.55^\circ) \times 0.9 \times 0.15406$$

$$D = 0.0152 \times 0.96340 \times 0.138654$$

$$D = 0.014640 \times 0.138654$$

$$D \approx 9.5 \text{ nm.}$$

**Table S1** Comparison of kinetic parameters of Ni(OH)<sub>2</sub>/Co<sub>3</sub>O<sub>4</sub> nanocomposites with other reported materials.

| Catalyst                                            | Substrate                     | $V_{\max}$<br>(M·s <sup>-1</sup> ) | $K_m$<br>(mM) | Reference        |
|-----------------------------------------------------|-------------------------------|------------------------------------|---------------|------------------|
| Fe SAEs                                             | TMB                           | $5.88 \times 10^{-8}$              | 3.92          | 1                |
|                                                     | H <sub>2</sub> O <sub>2</sub> | $8.25 \times 10^{-8}$              | 0.243         |                  |
| Au NPs/Cu-MOFNs                                     | TMB                           | $6.60 \times 10^{-9}$              | 0.29          | 2                |
|                                                     | H <sub>2</sub> O <sub>2</sub> | $3.75 \times 10^{-9}$              | 0.65          |                  |
| Cu <sub>3</sub> P NPs                               | TMB                           | $4.26 \times 10^{-8}$              | 3.67          | 3                |
|                                                     | H <sub>2</sub> O <sub>2</sub> | $5.16 \times 10^{-8}$              | 8.11          |                  |
| PANi– MnO <sub>2</sub> –Pd                          | TMB                           | $300.24 \times 10^{-9}$            | 0.13          | 4                |
|                                                     | H <sub>2</sub> O <sub>2</sub> | $172.8 \times 10^{-9}$             | 2.55          |                  |
| ZnBNC                                               | TMB                           | $6.00 \times 10^{-8}$              | 0.07          | 5                |
|                                                     | H <sub>2</sub> O <sub>2</sub> | $12.24 \times 10^{-8}$             | 4.70          |                  |
| PNPG-PEG                                            | TMB                           | $3.0276 \times 10^{-9}$            | 0.2828        | 6                |
|                                                     | H <sub>2</sub> O <sub>2</sub> | $2.467 \times 10^{-9}$             | 0.0799        |                  |
| Ni(OH) <sub>2</sub> /Co <sub>3</sub> O <sub>4</sub> | TMB                           | $4.77 \times 10^{-8}$              | 0.53          | <i>This work</i> |

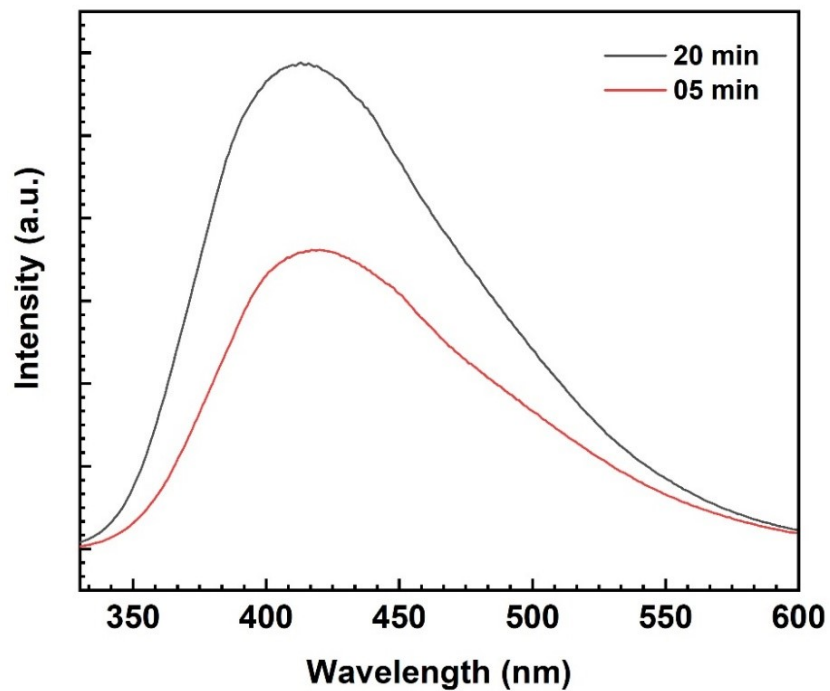

**Fig. S1.** Photoluminescence spectra (PL) of TMB oxidation reaction confirming the generation of  $\bullet\text{OH}$  radicals

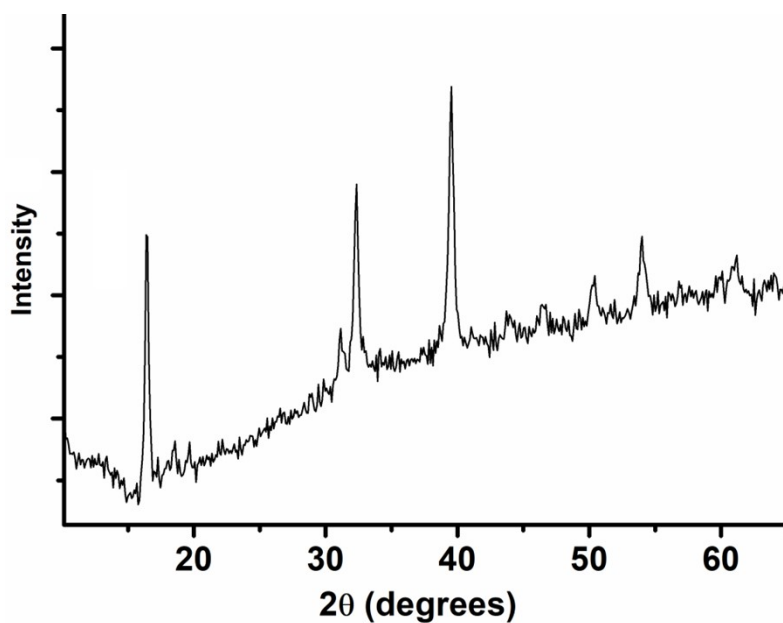

**Fig. S2** PXRD analysis on the catalyst recovered after five consecutive cycles.

## References

1. C. Zhao, C. Xiong, X. Liu, M. Qiao, Z. Li, T. Yuan *et al.*, *Chem. Commun.*, 2019, 55(16), 2285–2288.
2. X. Liao, Q. Xu, H. Sun, W. Liu, Y. Chen, X.-H. Xia *et al.*, *J. Phys. Chem. Lett.*, 2022, 13(1), 312–323.
3. J. Wang, Z. W. Jiang and Y. Wang, *Sens. Actuators B Chem.*, 2024, 415, 136012.
4. M. Zhong, M. Chi, F. Ma, Y. Zhu, C. Wang and X. Lu, *ACS Sustain. Chem. Eng.*, 2018, 6(12), 16482–16492.
5. X. Yang, X. Chen, H. Yang, Y. Fan, L. Jiang and F. Huo, *Spectrochim. Acta Part A*, 2024, 125328.
6. S. Ghayyem, A. Swaidan, A. Barras, M. Dolci, F. Faridbod, S. Szunerits *et al.*, *Talanta*, 2021, 226, 122082.
